# Supplementary material for: Continuous flow synthesis of amine oxides by oxidation of tertiary amines
Source: Royal Society of Chemistry journal article supplement (doi:10.1039/c9re00127a), 2019-01-01
Supplement: c9re00127a1.pdf [file c9re00127a1.pdf]

## Electronic Supplementary Material

### Continuous flow synthesis of amine oxides by oxidation of tertiary amines

Tobias Baumeister,<sup>a</sup> Stefan Zikeli,<sup>b</sup> Hannes Kitzler,<sup>b</sup> Paul Aigner,<sup>b</sup> Piotr P. Wieczorek,<sup>c</sup>  
and Thorsten Röder\*<sup>a</sup>

<sup>a</sup> Institute of Chemical Process Engineering, Mannheim University of Applied Sciences, Paul-Wittsack-Str. 10,  
68163 Mannheim, Germany. E-mail: t.roeder@hs-mannheim.de

<sup>b</sup> one-A Engineering Austria GmbH, See-Str. 11, 4844 Regau, Austria.

<sup>c</sup> Department of Analytical and Ecological Chemistry, University of Opole, Pl. Kopernika 11, 45-040 Opole,  
Poland.

#### Table of contents

|                                                                                                          |    |
|----------------------------------------------------------------------------------------------------------|----|
| 1. Calculation of the microreactor volume                                                                | 1  |
| 2. Calculation of the residence time                                                                     | 1  |
| 3. Experimental procedure for dissolving CO <sub>2</sub> in the NMM (1) stock solution                   | 2  |
| 4. HPLC-Method for quantitative analysis of NMM (1), NMMO (2) and morpholine                             | 3  |
| 5. GC-MS-Method for quantitative analysis of the by-product NNM                                          | 8  |
| 6. Influence of phosphoric acid on the conversion of NMM (1) and yield of NMMO (2)                       | 10 |
| 7. Influence of the molar excess of hydrogen peroxide on the conversion of NMM (1) and yield of NMMO (2) | 11 |
| 8. Experimental data for the conversion of NMM (1) and yield of NMMO (2) without CO <sub>2</sub>         | 13 |
| 9. Corresponding selectivity of the experiments at 40 °C - 60 °C from Fig. 4                             | 14 |
| 10. Experimental data for the conversion of NMM (1) at 70 °C                                             | 15 |
| 11. Experimental data of the scale-up experiments                                                        | 15 |
| 12. Kinetic model for the oxidation of NMM (1)                                                           | 16 |
| 13. Calculation of the temperature profile for the oxidation of NMM (1)                                  | 19 |

## 1. Calculation of the microreactor volume

Microreactor volume for the conducted experiments:

|                                                                                                          |                       |
|----------------------------------------------------------------------------------------------------------|-----------------------|
| - 5 microchannels (length: 750 mm, internal diameter: 1 mm):                                             | 3.02 mL               |
| - PTFE capillary for sampling at the end of the microreactor (length: 300 mm, internal diameter: 1/16"): | 0.595 mL              |
| - PTFE capillary to connect the two microreactor plates (length: 68 mm, internal diameter: 1/16"):       | 0.135 mL              |
| <b><u>Total volume:</u></b>                                                                              | <b><u>3.75 mL</u></b> |

Microreactor volume for the scale-up experiments:

|                                                                                                          |                        |
|----------------------------------------------------------------------------------------------------------|------------------------|
| - 6 microchannels (length: 750 mm, internal diameter: 1 mm):                                             | 3.63 mL                |
| - 2 microchannels (length: 750 mm, internal diameter: 3 mm):                                             | 10.60 mL               |
| - PTFE capillary for sampling at the end of the microreactor (length: 300 mm, internal diameter: 1/16"): | 0.595 mL               |
| - PTFE capillary to connect the two microreactor plates (length: 68 mm, internal diameter: 1/16"):       | 0.135 mL               |
| <b><u>Total volume:</u></b>                                                                              | <b><u>14.96 mL</u></b> |

## 2. Calculation of the residence time

The residence time (rt) is calculated as follows:

$$rt [min] = \frac{\text{total microreactor volume [mL]}}{(\text{flow rate NMM (1) solution} + \text{flow rate } H_2O_2 \text{ solution}) \left[\frac{ml}{min}\right]}$$

For example calculation of the residence time for the scale-up experiments:

$$rt [min] = \frac{14.96 [mL]}{(1.2 + 0.67) \left[\frac{ml}{min}\right]} = \frac{14.96 [mL]}{1.87 \left[\frac{mL}{min}\right]} = 8.00 min$$

### 3. Experimental procedure for dissolving CO<sub>2</sub> in the NMM (1) stock solution

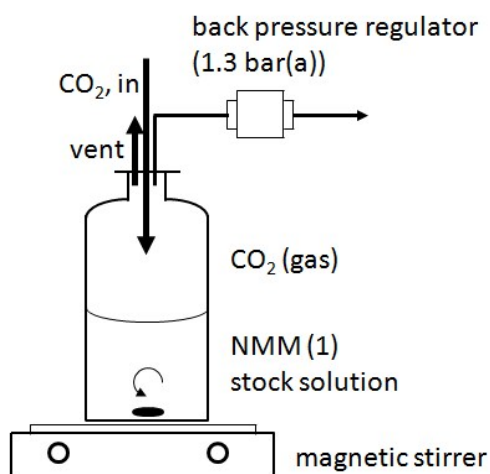

Fig. ESI-1 Experimental procedure for dissolving carbon dioxide (CO<sub>2</sub>) in the NMM (1) stock solution.

As described in the main article, carbon dioxide catalyses the oxidation of NMM (1) to NMMO (2). CO<sub>2</sub> is dissolved prior to the reaction in the NMM (1) stock solution according to Figure ESI-1. The CO<sub>2</sub> gas is passed into the laboratory flask and is dissolved under stirring at an excess pressure of 0.3 bar. To achieve the excess pressure a back pressure regulator (0.3 bar, P-790, IDEX, United States of America) was attached to the laboratory bottle. The laboratory bottle (DWK Life Sciences GmbH, Germany) was weighed before and after dosing to determine the mass fraction of CO<sub>2</sub> in the NMM (1) stock solution. After dosing of CO<sub>2</sub> the vent valve was opened before the bottle was weighed for the second time.

#### 4. HPLC-Method for quantitative analysis of NMM (1), NMMO (2) and morpholine

Quantitative analyses of the experiments were carried out by HPLC (1100, Agilent Technologies, Inc., United States of America) using a VA 150/4.6 Nucleogel RP 100-8 column (150 x 4 mm) (Macherey-Nagel, Germany). Samples to analyze the reaction process were diluted with deionized water in a ratio of 10:1 (v/v) and analyzed immediately after collection.

Chromatographic conditions:

|                   |                                                                       |
|-------------------|-----------------------------------------------------------------------|
| Flow rate:        | 1 mL/min                                                              |
| Temperature:      | 10 °C                                                                 |
| Injection volume: | 100 µL                                                                |
| Wavelength:       | 200 nm                                                                |
| Mobile phase:     | Eluent A: methanol<br>Eluent B: 0.05 M Sodium metaborate tetrahydrate |

Gradient:

| Time [min] | Eluent A [%] | Eluent B [%] | Type      |
|------------|--------------|--------------|-----------|
| 0 – 8      | 5            | 95           | isocratic |
| 8 – 18     | 5 – 65       | 95 – 35      | linear    |
| 18 – 22    | 65 – 100     | 35 – 0       | linear    |
| 22 – 27    | 100          | 0            | isocratic |
| 27 – 29    | 100 – 5      | 0 – 95       | linear    |
| 29 – 33    | 5            | 95           | isocratic |

Different amounts of NMM (1), NMMO (2) and morpholine (by-product) were dissolved in 10 mL of deionized water respectively to obtain standard solutions. The standard solutions were analyzed by HPLC using the described method. The area of the corresponding peaks were plotted against the amounts of substance. The respectively obtained gradient from the straight lines is used for the determination of conversion and yield from the samples of the reaction process. The samples from the lab trials were analyzed according to the described HPLC method like the standard solutions.

## Calibration of NMM (1)

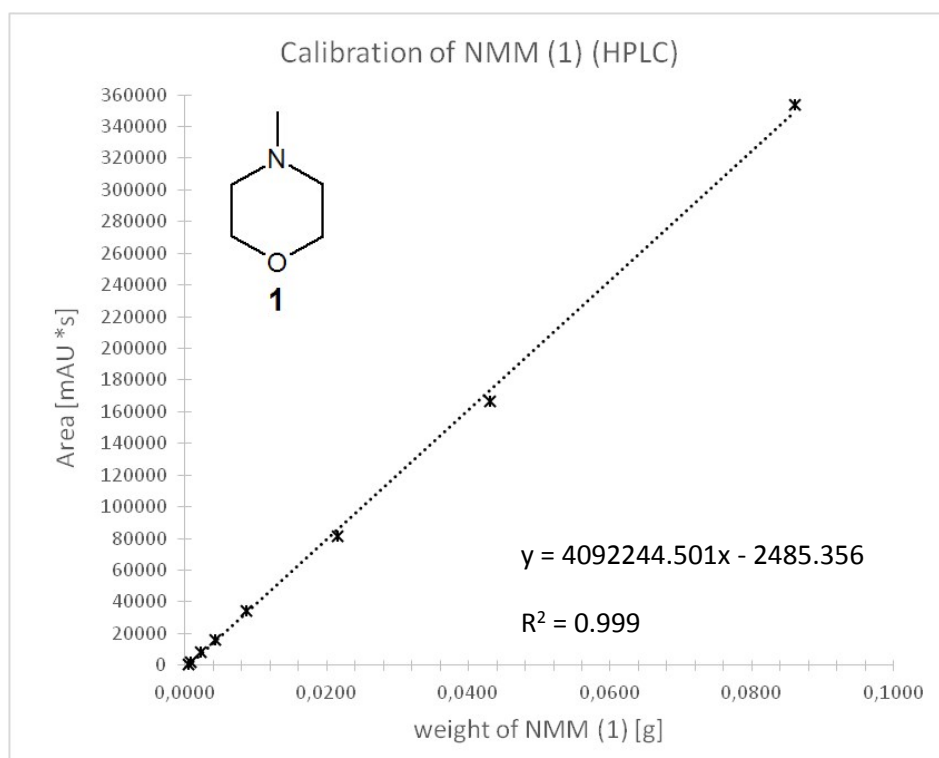

Fig. ESI-2 Calibration of NMM (1) according to the described HPLC method.

Table ESI-1 Sample amount of NMM (1) and the corresponding areas obtained from the HPLC measurement.

| sample amount<br>NMM (1) [g] | area integral<br>HPLC [mAu*s] |
|------------------------------|-------------------------------|
| 0.0860                       | 353664                        |
| 0.0430                       | 166860                        |
| 0.0215                       | 81144                         |
| 0.0086                       | 34415                         |
| 0.0043                       | 16292                         |
| 0.0022                       | 8225                          |
| 0.00086                      | 1654                          |
| 0.00043                      | 772                           |

## Calibration of NMMO (2)

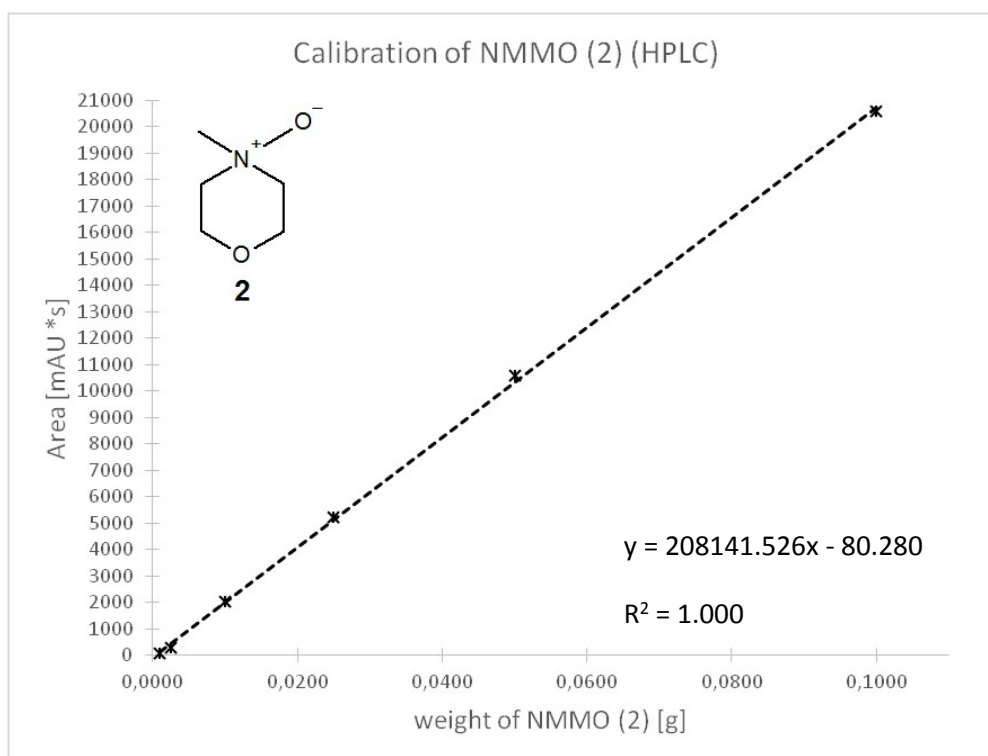

Fig. ESI-3 Calibration of NMMO (2) according to the described HPLC method.

Table ESI-2 Sample amount of NMMO (2) and the corresponding areas obtained from the HPLC measurement.

| sample amount<br>NMMO (2) [g] | area integral<br>HPLC [mAu*s] |
|-------------------------------|-------------------------------|
| 0.1                           | 20589                         |
| 0.05                          | 10567                         |
| 0.025                         | 5230                          |
| 0.01                          | 2030                          |
| 0.005                         | 407                           |
| 0.0025                        | 274                           |
| 0.001                         | 63                            |

## Calibration of morpholine

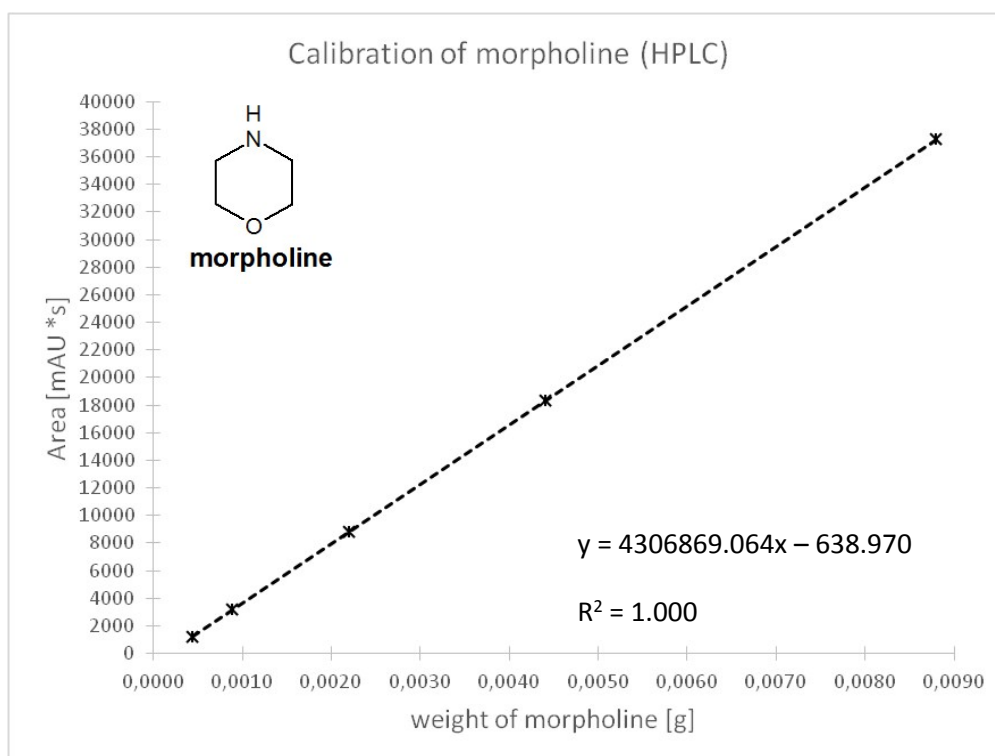

Fig. ESI-4 Calibration of morpholine (by-product) according to the described HPLC method.

Table ESI-3 Sample amount of morpholine (by-product) and the corresponding areas obtained from the HPLC measurement.

| sample amount<br>morpholine [g] | area integral<br>HPLC [mAu*s] |
|---------------------------------|-------------------------------|
| 0.0088                          | 37255                         |
| 0.0044                          | 18334                         |
| 0.022                           | 8807                          |
| 0.00088                         | 3186                          |
| 0.00044                         | 1234                          |

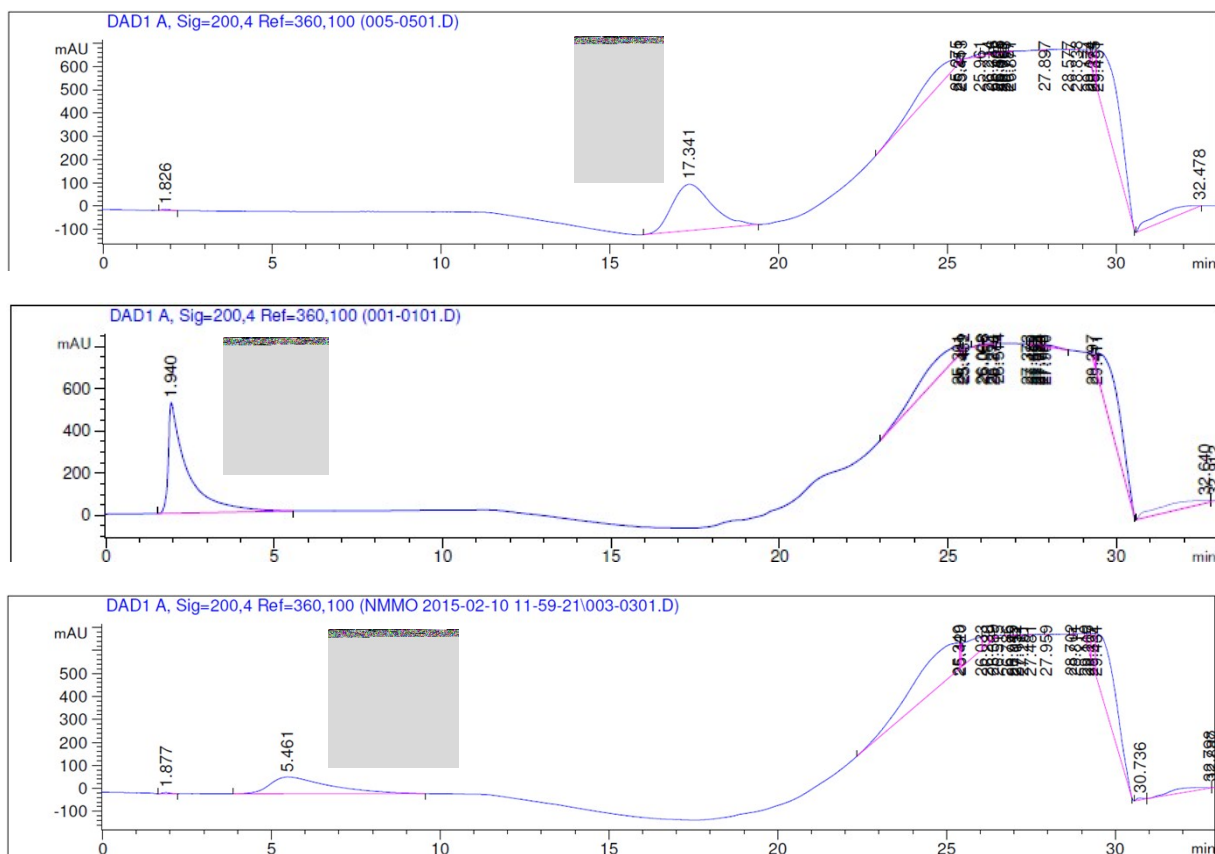

Fig. ESI-5 Chromatogram (standard solutions) of NMM (1) Ret.: 17.341 min (above), NMMO (2) Ret.: 1.940 min (middle) and morpholine (by-product) Ret.: 5.461 min (below).

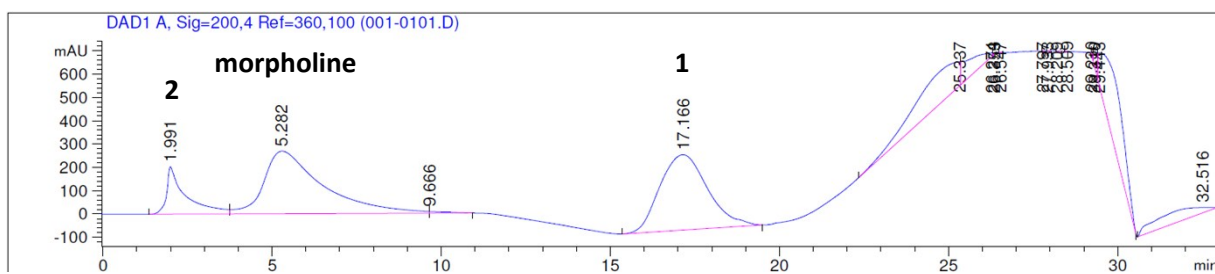

Fig. ESI-6 Chromatogram mixture of NMM (1) Ret.: 17.166 min, NMMO (2) Ret.: 1.991 min and morpholine (by-product) Ret.: 5.282 min.



## 5. GC-MS-Method for quantitative analysis of the by-product NNM

Quantitative analyses of the by-product N-nitrosomorpholine (NNM) was carried out by Gas Chromatography/Mass Spectrometry (GC-MS) (HP 6890/HP 5973) equipped with a DB-1701 column (30 m x 0.32 mm x 1  $\mu$ m) (Agilent Technologies Inc., United States of America). Prior to analyses NNM was extracted from the NMMO (2) product solution by liquid-liquid extraction with a mixture of dichloromethane (DCM) and ethyl formate (EF) in a ratio of 1:1 (v/v).

Chromatographic conditions:

|                   |                     |
|-------------------|---------------------|
| Flow rate:        | 2.5 mL/min          |
| Temperature:      | 40 °C for 1.10 min  |
| Gradient I:       | 8 °C/min to 180 °C  |
| Gradient II:      | 35 °C/min to 280 °C |
| End temperature:  | 280 °C for 15 min   |
| Injection volume: | 4 $\mu$ L           |
| Carrier gas:      | Helium              |

Detection parameters:

|             |                                               |
|-------------|-----------------------------------------------|
| Mode:       | Selected ion monitoring (SIM)                 |
| m/z ratios: | 116, 86, 56 (NNM)                             |
|             | 272 (octafluoronaphthalene) internal standard |
| Dwell time: | 20 ms                                         |

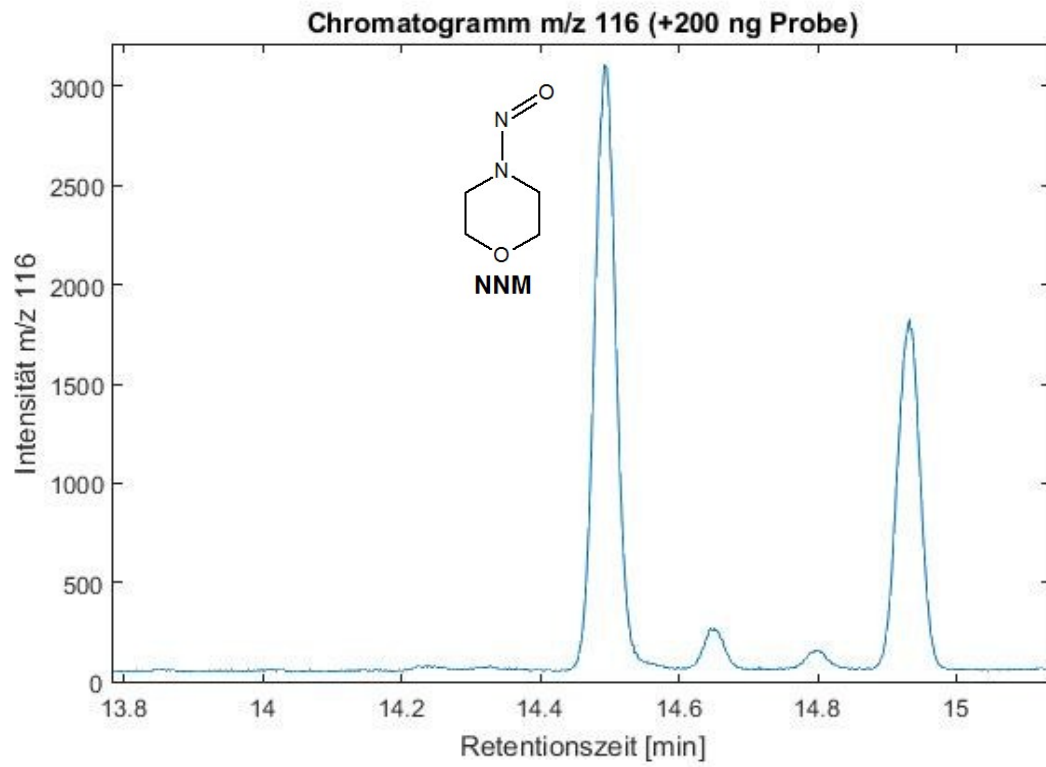

Fig. ESI-7 Chromatogram NNM (m/z: 116).

## 6. Influence of phosphoric acid on the conversion of NMM (1) and yield of NMMO (2)

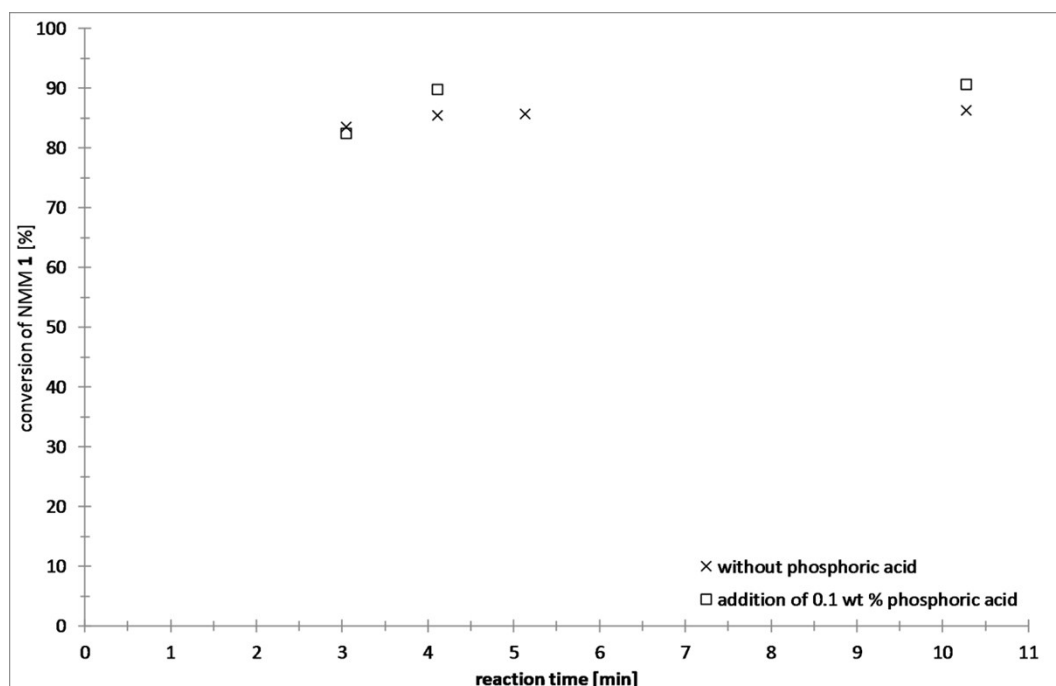

Fig. ESI-8 Influence of phosphoric acid on the conversion of NMM (1), at 60 °C, 17 bar(a), concentration (NMM (1)) 8.5 mol/L, flow rate (NMM (1)) 0.8 – 2.7 mL/min, flow rate (hydrogen peroxide) 0.72 – 2.42 mL/min, concentration (hydrogen peroxide) 32 wt %, concentration of carbon dioxide 1 wt %, ratio of NMM (1)/H<sub>2</sub>O<sub>2</sub> 1/1.1, residence time 3.04-10.25 min, microreactor volume 15.58 mL.

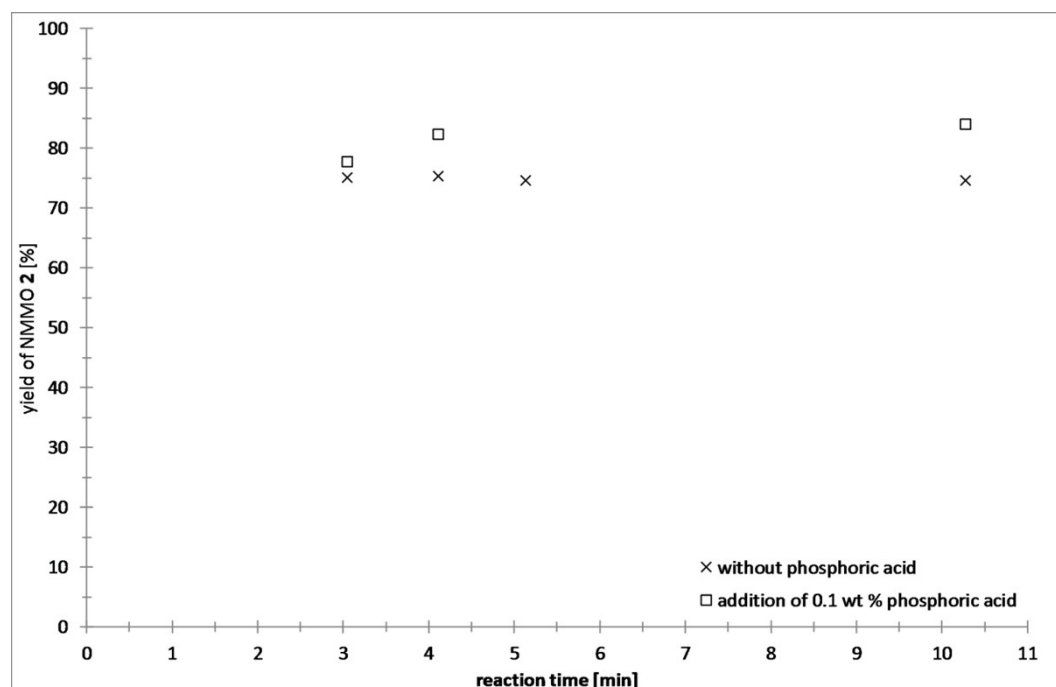

Fig. ESI-9 Influence of phosphoric acid on the yield of NMMO (2) at 60 °C, 17 bar(a), concentration (NMM (1)) 8.5 mol/L, flow rate (NMM (1)) 0.8 – 2.7 mL/min, flow rate (hydrogen peroxide) 0.72 – 2.42 mL/min, concentration (hydrogen peroxide) 32 wt %, concentration of carbon dioxide 1 wt %, ratio of NMM (1)/H<sub>2</sub>O<sub>2</sub> 1/1.1, residence time 3.04-10.25 min, microreactor volume 15.58 mL.

## 7. Influence of the molar excess of hydrogen peroxide on the conversion of NMM (1) and yield of NMMO (2)

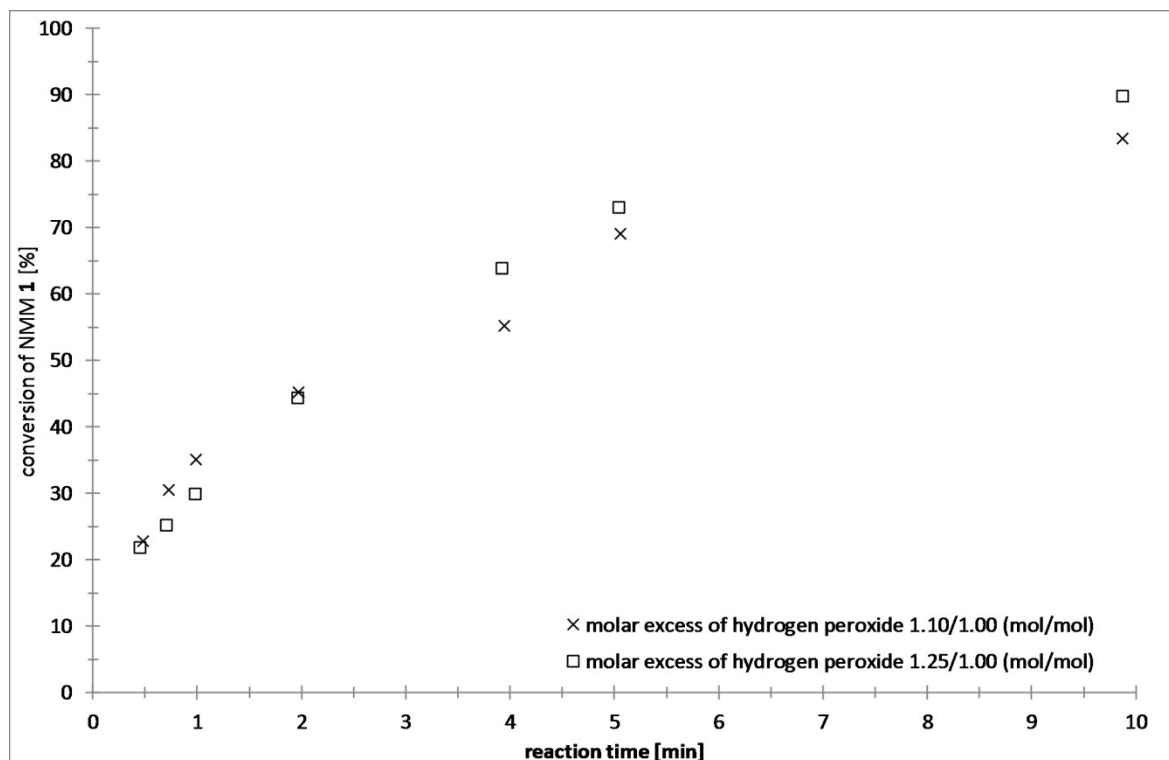

Fig. ESI-10 Influence of the molar excess of hydrogen peroxide on the conversion of NMM (1), at 50 °C, 17 bar(a), concentration (NMM (1)) 8.5 mol/L, flow rate (NMM (1)) 0.2 – 4.1 mL/min (X), flow rate (NMM (1)) 0.18 – 3.9 mL/min (□), flow rate (hydrogen peroxide) 0.18 – 3.68 mL/min (X), flow rate (hydrogen peroxide) 0.20 – 4.38 mL/min (□), concentration (hydrogen peroxide) 29 wt %, concentration of carbon dioxide 0.5 wt %, ratio of NMM (1)/H<sub>2</sub>O<sub>2</sub> 1/1.1 (X), ratio of NMM (1)/H<sub>2</sub>O<sub>2</sub> 1/1.25 (□), residence time 0.48 - 9.87 min (X), residence time 0.45 - 9.87 min (□), microreactor volume 3.75 mL.

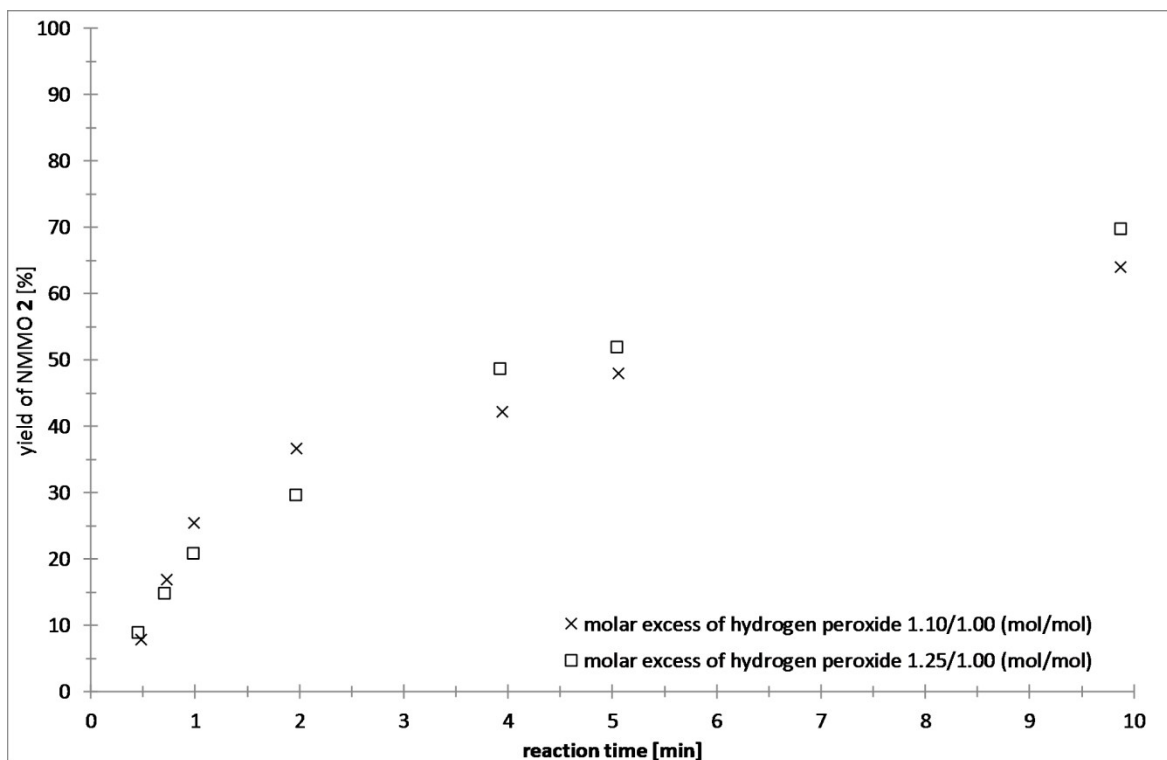

Fig. ESI-11 Influence of the molar excess of hydrogen peroxide on the yield of NMMO (2), at 50 °C, 17 bar(a), concentration (NMM (1)) 8.5 mol/L, flow rate (NMM (1)) 0.2 – 4.1 mL/min (X), flow rate (NMM (1)) 0.18 – 3.9 mL/min (□), flow rate (hydrogen peroxide) 0.18 – 3.68 mL/min (X), flow rate (hydrogen peroxide) 0.20 – 4.38 mL/min (□), concentration (hydrogen peroxide) 29 wt %, concentration of carbon dioxide 0.5 wt %, ratio of NMM (1)/H<sub>2</sub>O<sub>2</sub> 1/1.1 (X), ratio of NMM (1)/H<sub>2</sub>O<sub>2</sub> 1/1.25 (□), residence time 0.48 - 9.87 min (X), residence time 0.45 - 9.87 min (□), microreactor volume 3.75 mL.

## 8. Experimental data for the conversion of NMM (1) and yield of NMMO (2) without CO<sub>2</sub>

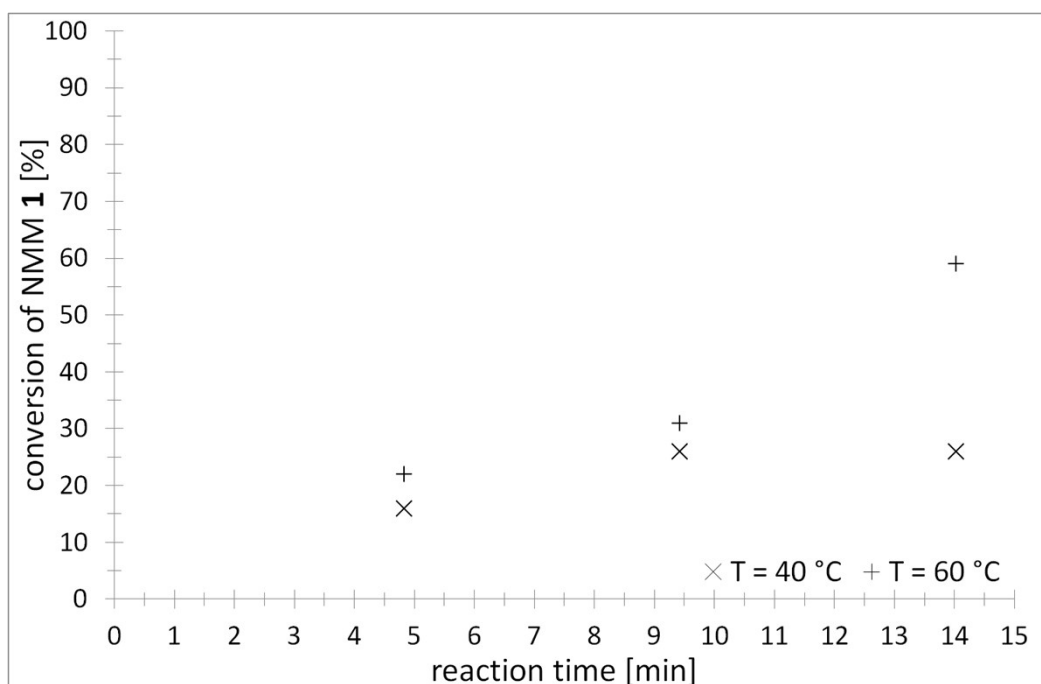

Fig. ESI-12 Conversion of NMM (1) without CO<sub>2</sub> at 40 and 60 °C, concentration (NMM (1)) 8.5 mol/L, flow rate (NMM (1)) 0.23 – 0.67 mL/min, flow rate (hydrogen peroxide) 0.20 – 0.58 mL/min, concentration (hydrogen peroxide) 30 wt %, ratio of NMM (1)/H<sub>2</sub>O<sub>2</sub> 1.0/1.0, residence time 5.08 - 14.80 min, microreactor volume 6.36 mL.

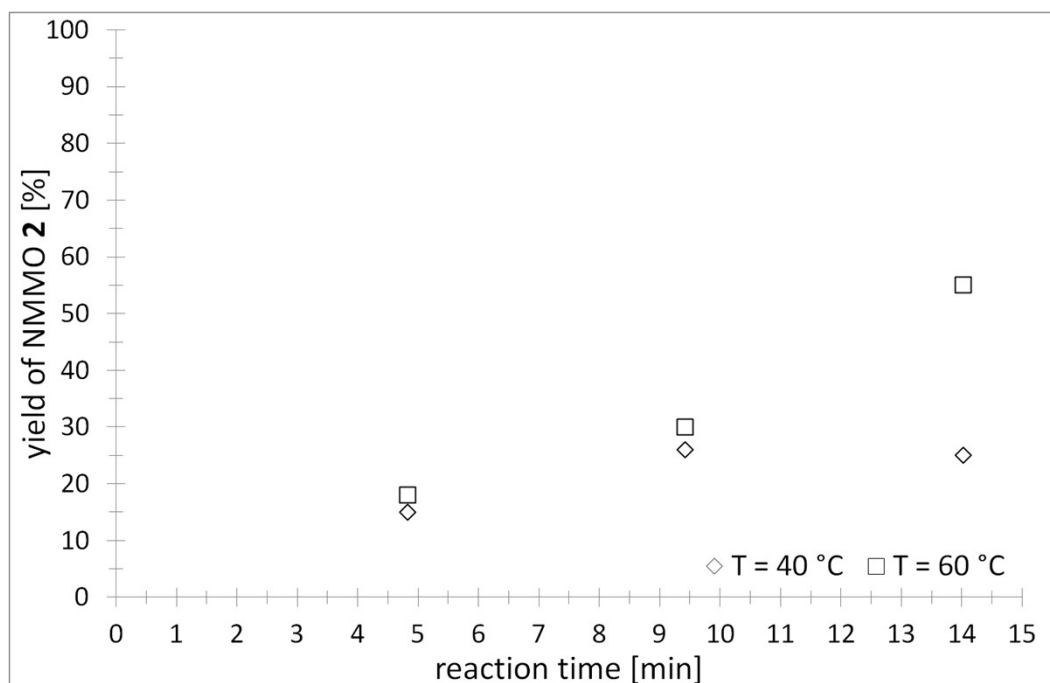

Fig. ESI-13 Yield of NMMO (2) without CO<sub>2</sub> at 40 and 60 °C, concentration (NMM (1)) 8.5 mol/L, flow rate (NMM (1)) 0.23 – 0.67 mL/min, flow rate (hydrogen peroxide) 0.20 – 0.58 mL/min, concentration (hydrogen peroxide) 30 wt %, ratio of NMM (1)/H<sub>2</sub>O<sub>2</sub> 1.0/1.0, residence time 5.08 - 14.80 min, microreactor volume 6.36 mL.

## 9. Corresponding selectivity of the experiments at 40 °C - 60 °C from Fig. 4

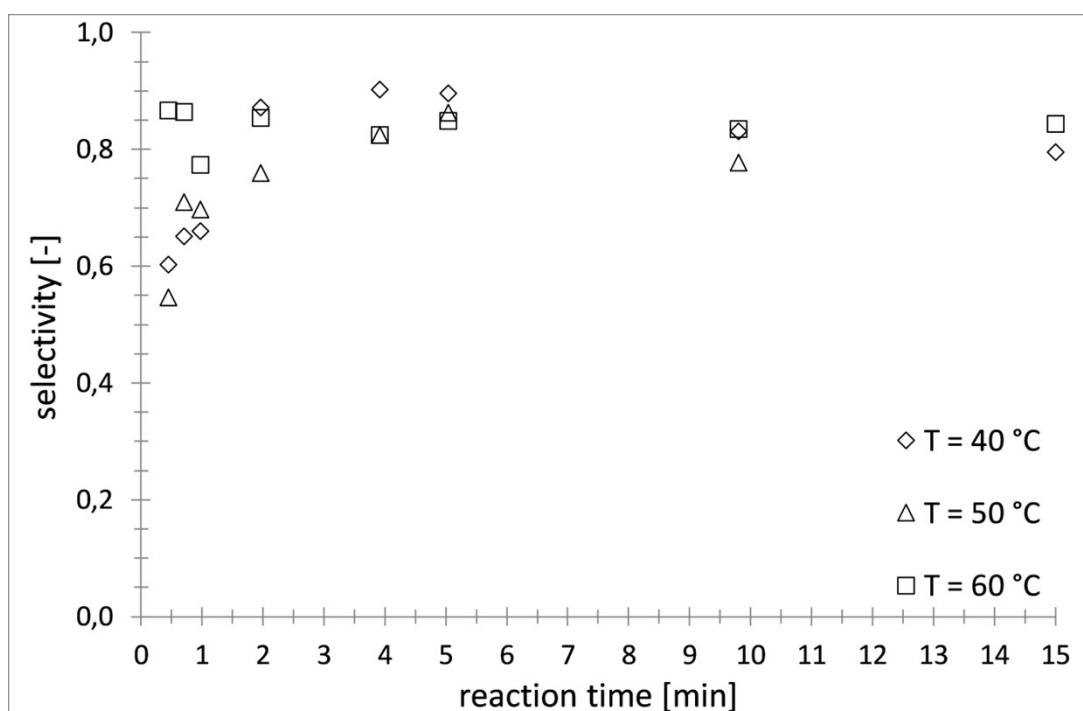

Fig. ESI-14 Selectivity at different reaction temperatures 40, 50 and 60 °C, concentration of hydrogen peroxide 29 wt %, 1 wt % of carbon dioxide, 17 bar(a), concentration (NMM (1)) 8.5 mol/L, flow rate (NMM (1)) 0.12 – 3.9 mL/min, flow rate (hydrogen peroxide) 0.13 – 4.38 mL/min, ratio of NMM (1)/H<sub>2</sub>O<sub>2</sub> 1/1.25, residence time 0.45 – 15.00 min, microreactor volume 3.75 mL.

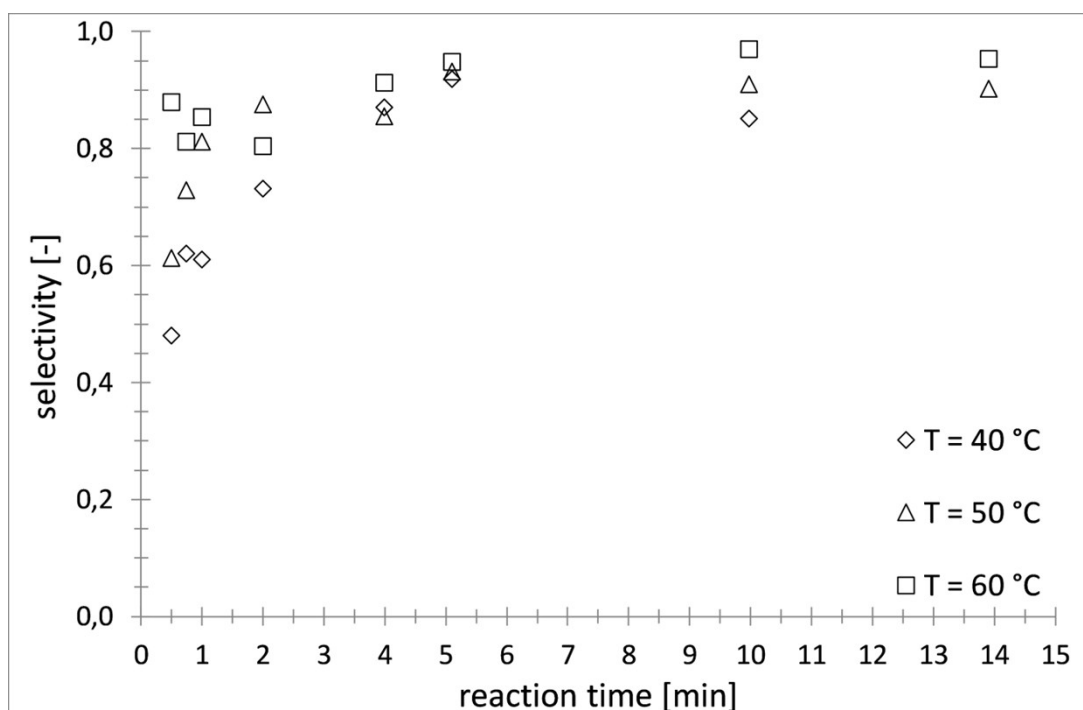

Fig. ESI-15 Selectivity at different reaction temperatures 40, 50 and 60 °C, concentration of hydrogen peroxide 50,75 wt %, 1 wt % of carbon dioxide, 17 bar(a), concentration (NMM (1)) 8.5 mol/L, flow rate (NMM (1)) 0.17 – 4.8 mL/min, flow rate (hydrogen peroxide) 0.10 – 2.71 mL/min, ratio of NMM (1)/H<sub>2</sub>O<sub>2</sub> 1/1.1, residence time 0.50 – 13.90 min, microreactor volume 3.75 mL.

## 10. Experimental Data for the conversion of NMM (1) at 70 °C

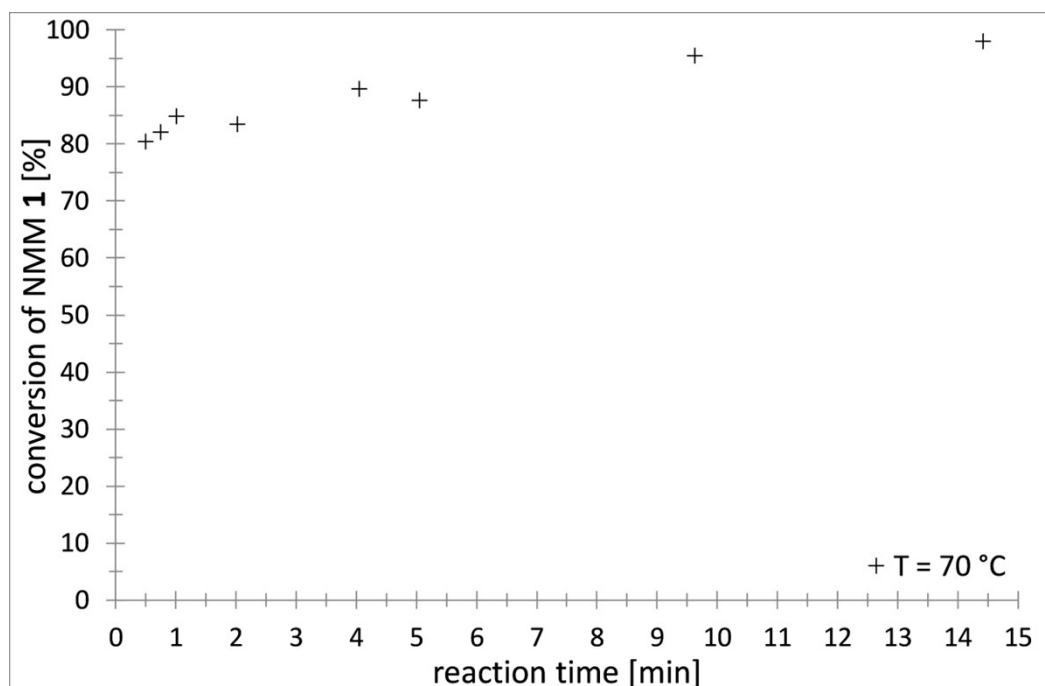

Fig. ESI-16 Conversion of NMM (1) at 70 °C, 17 bar(a), concentration (NMM (1)) 8.5 mol/L, flow rate (NMM (1)) 0.14 – 4.1 mL/min, flow rate (hydrogen peroxide) 0.12 – 3.50 mL/min, concentration (hydrogen peroxide) 33.6 wt %, ratio of NMM (1)/H<sub>2</sub>O<sub>2</sub> 1/1.1, residence time 0.49 - 14.42 min, microreactor volume 3.75 mL.

## 11. Experimental Data of the scale-up experiments

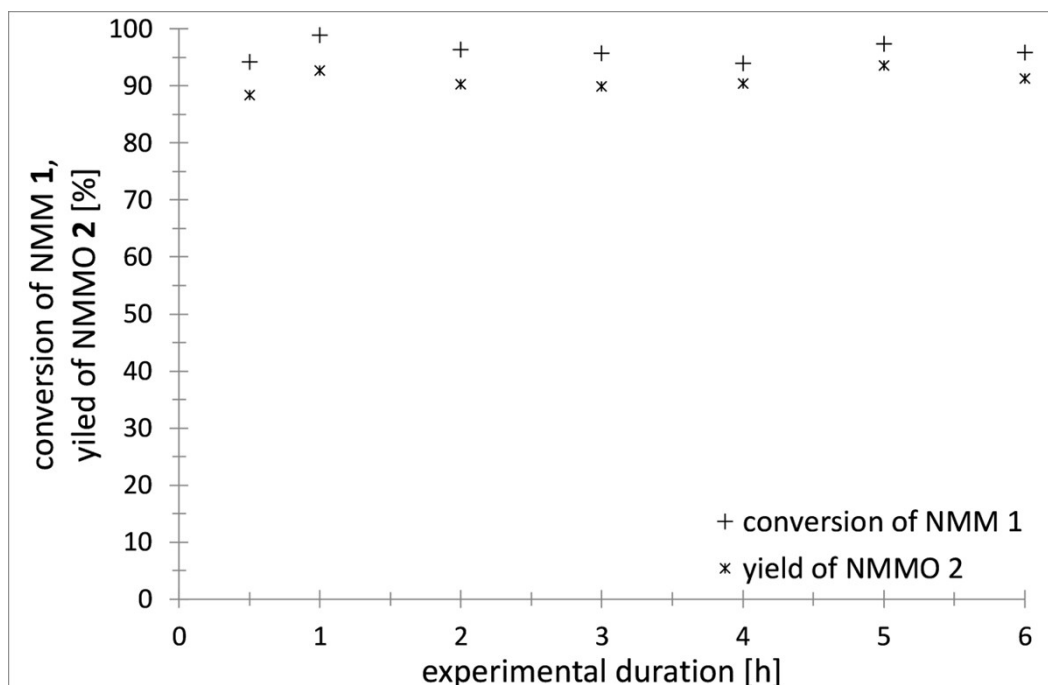

Fig. ESI-17 Conversion of NMM (1) and yield of NMMO (2) at 60 °C, 17 bar(a), concentration (NMM (1)) 8.5 mol/L, flow rate (NMM (1)) 1.20 mL/min, flow rate (hydrogen peroxide) 0.67 mL/min, concentration (hydrogen peroxide) 51 wt %, ratio of NMM (1)/H<sub>2</sub>O<sub>2</sub> 1/1.1, residence time 8.00 min, microreactor volume 14.96 mL. This leads to a scale-up factor of 4 for flow rate (NMM (1)), flow rate (hydrogen peroxide) and microreactor volume.



## 12. Kinetic model for the oxidation of NMM (1)

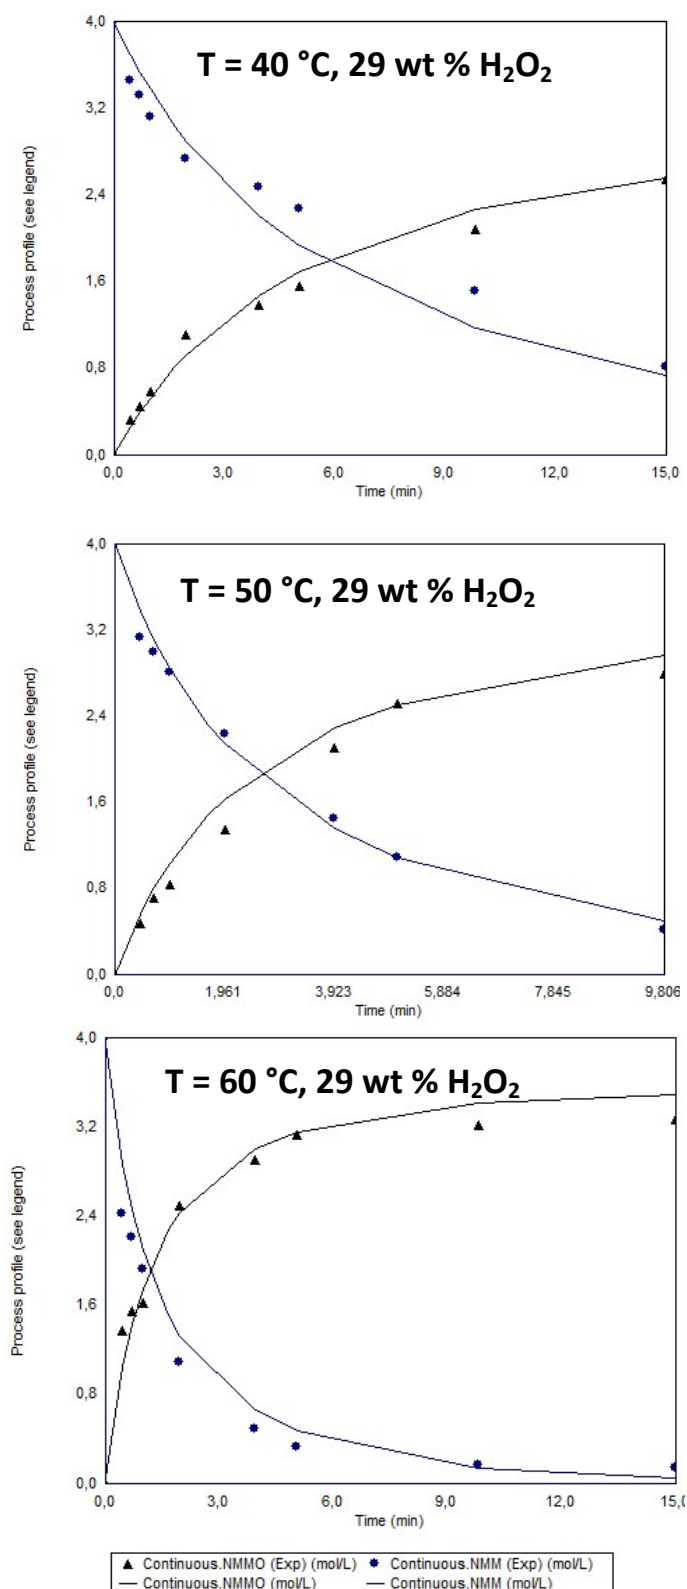

Fig. ESI-18 Kinetic model and experimental data for the conversion of NMM (1) and yield of NMMO (2) at different reaction temperatures 40, 50 and 60 °C, concentration of hydrogen peroxide 29 wt %, 1 wt % of carbon dioxide, 17 bar(a), concentration (NMM (1)) 8.5 mol/L, flow rate (NMM (1)) 0.12 – 3.9 mL/min, flow rate (hydrogen peroxide) 0.13 – 4.38 mL/min, ratio of NMM (1)/H<sub>2</sub>O<sub>2</sub> 1/1.25, residence time 0.45 – 15.00 min, microreactor volume 3.75 mL.

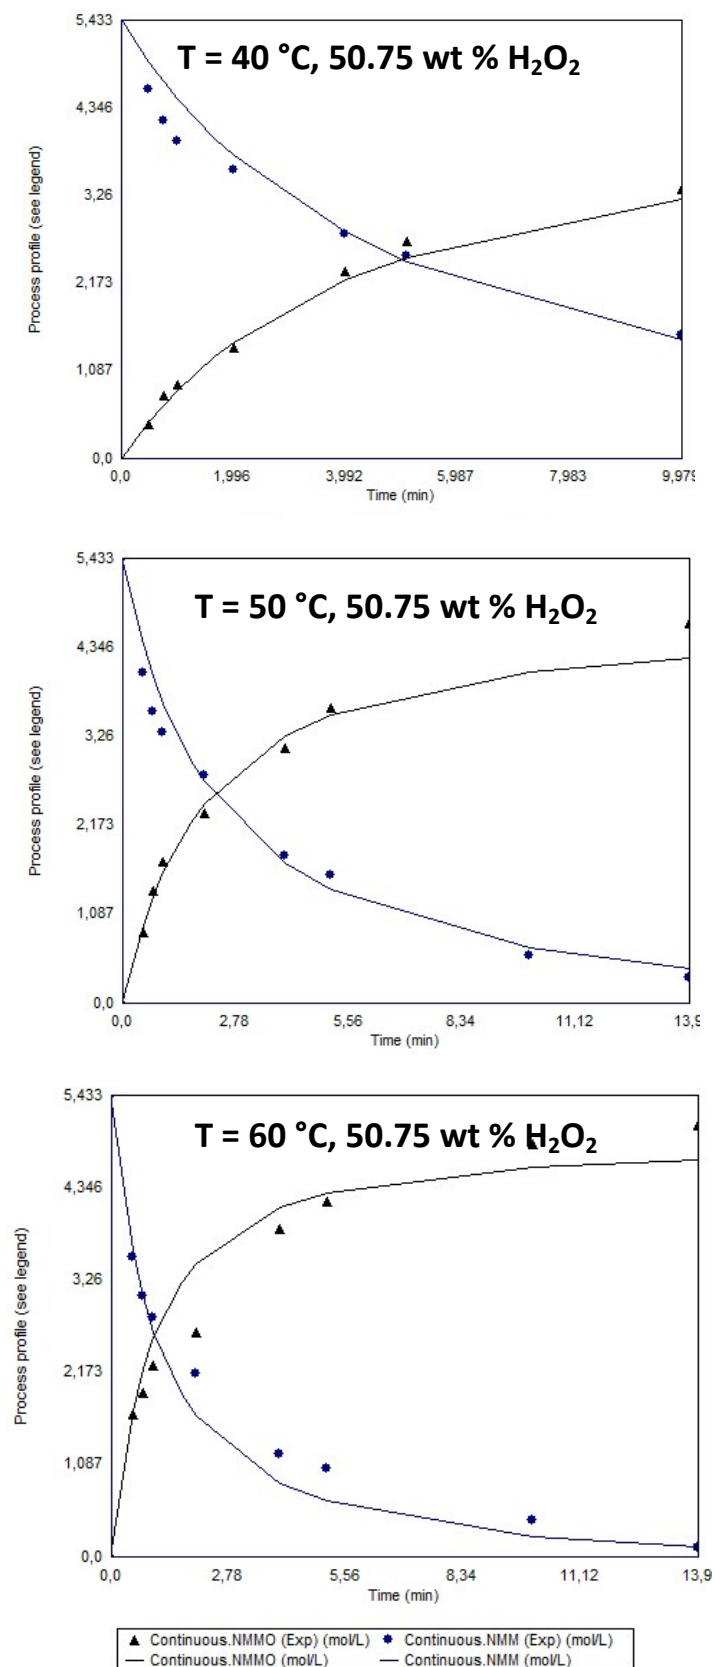

Fig. ESI-19 Kinetic model and experimental data for the conversion of NMM (1) and yield of NMMO (2) at different reaction temperatures 40, 50 and 60 °C, concentration of hydrogen peroxide 50.75 wt %, 1 wt % of carbon dioxide, 17 bar(a), concentration (NMM (1)) 8.5 mol/L, flow rate (NMM (1)) 0.17 – 4.8 mL/min, flow rate (hydrogen peroxide) 0.10 – 2.71 mL/min, ratio of NMM (1)/H<sub>2</sub>O<sub>2</sub> 1/1.1, residence time 0.50 – 13.90 min, microreactor volume 3.75 mL.

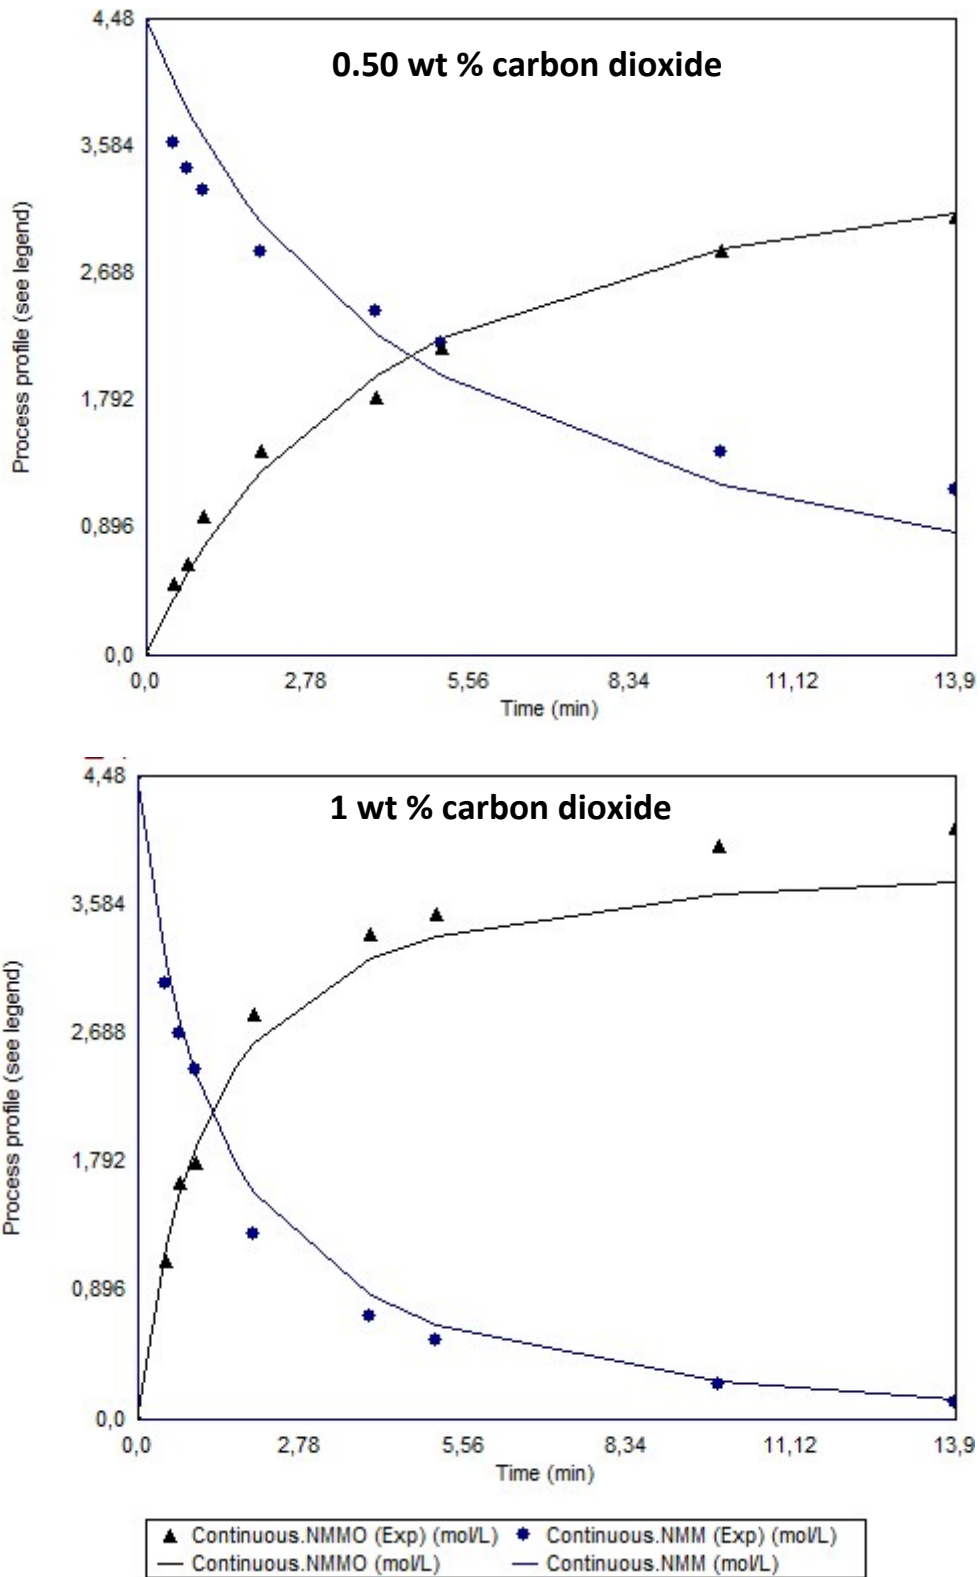

Fig. ESI-20 Kinetic model and experimental data for the conversion of NMM (1) and yield of NMMO (2) at 0.5 and 1 wt % of carbon dioxide, 50 °C, 17 bar(a), concentration (NMM (1)) 8.5 mol/L, flow rate (NMM (1)) 0.14 – 4.1 mL/min, flow rate (hydrogen peroxide) 0.13 – 3.68 mL/min, concentration (hydrogen peroxide) 29 wt %, ratio of NMM (1)/H<sub>2</sub>O<sub>2</sub> 1/1.1, residence time 0.48 – 13.90 min, microreactor volume 3.75 mL.

### 13. Calculation of the temperature profile for the oxidation of NMM (1)

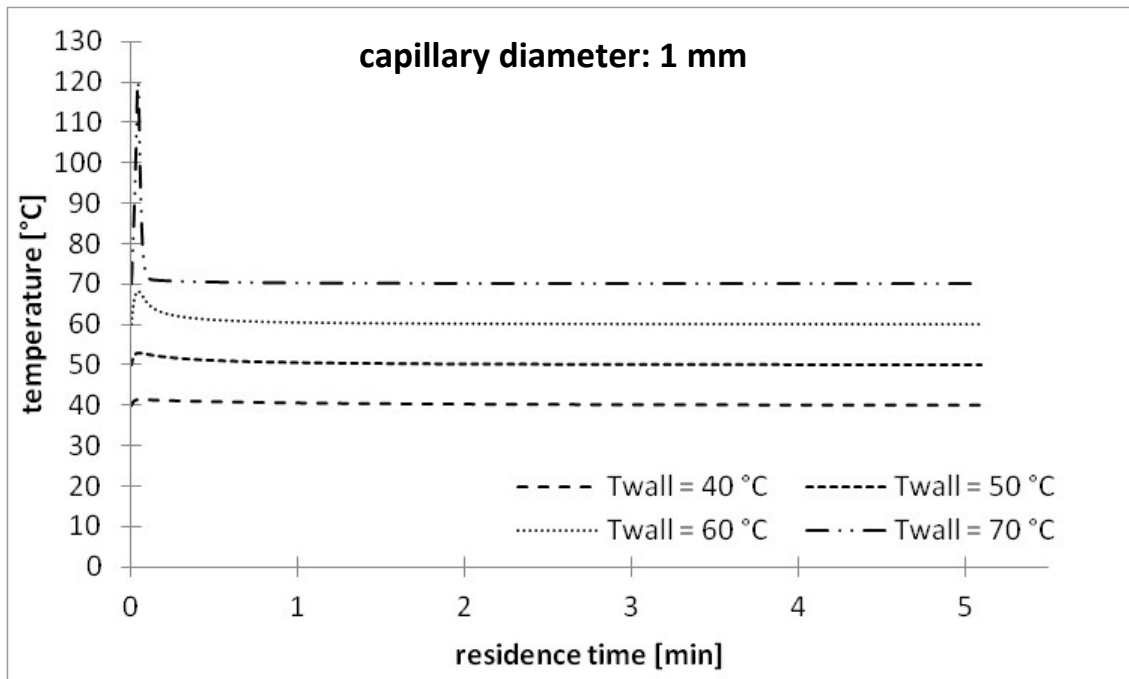

Fig. ESI-21 Simulation of the temperature in the microreactor channel (internal diameter: 1 mm) for a wall temperature of 40, 50, 60 and 70 °C.

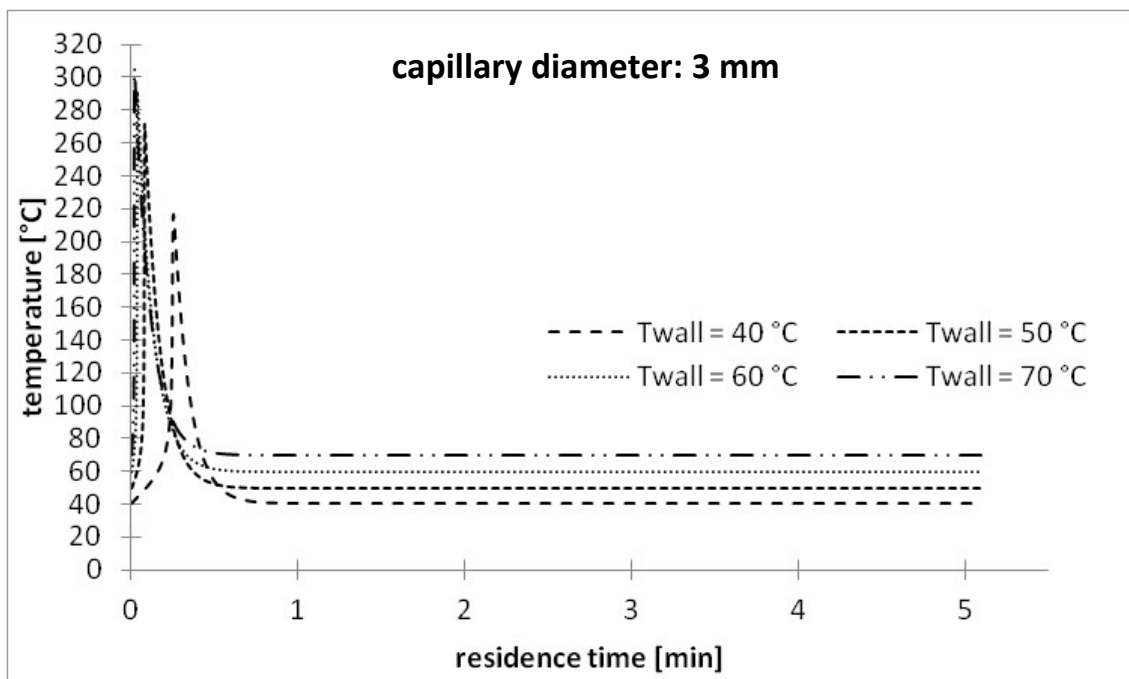

Fig. ESI-22 Simulation of the temperature in the microreactor channel (internal diameter: 3 mm) for a wall temperature of 40, 50, 60 and 70 °C.
